# Supplementary material for: Harvesting vibrational energy with liquid-bridged electrodes: thermodynamics in mechanically and electrically driven RC-circuits
Source: Royal Society of Chemistry journal article supplement (doi:10.1039/c5ra22814j), 2016-01-01
Supplement: c5ra22814j1.pdf [file c5ra22814j1.pdf]

# Supporting Information for:

## Harvesting vibrational energy with liquid-bridged electrodes: thermodynamics in mechanically and electrically driven RC-circuits

Mathijs Janssen\*, Ben Werkhoven, and René van Roij  
*Institute for Theoretical Physics, Center for Extreme Matter and Emergent Phenomena,  
Utrecht University, Leuvenlaan 4, 3584 CE Utrecht, The Netherlands*  
\*Corresponding author. E-mail: M.A.Janssen1@uu.nl

### TRADITIONAL RC-CIRCUIT

For comparison, we quickly recap some elementary results for traditional RC-circuits. The formal solution to eqn (4) for vanishing fixed charges  $Q_{b/t}$  reads

$$q(t) = q_0 e^{-\int_0^t \frac{1}{RC(t')} dt'} + e^{-\int_0^t \frac{1}{RC(t')} dt'} \int_0^t dt' \frac{V(t')}{R} e^{\int_0^{t'} \frac{1}{RC(t'')} dt''}, \quad (\text{S1})$$

which can for instance be found with variation of constants. A traditional RC-circuit has a constant capacitance  $C(t) = C$ , such that eqn (4) becomes a first order linear time-invariant theory, for which eqn (S1) simplifies to the well-known expression

$$q(t) = q_0 e^{-\frac{t}{RC}} + \int_0^t dt' \frac{V(t')}{R} e^{-\frac{t-t'}{RC}}. \quad (\text{S2})$$

In the case of a sinusoidal driving  $V(t) = V_0 \sin \omega t$ , we then find the potential over the load

$$V_L = \frac{RCi\omega}{1 + RCi\omega} V_0, \quad (\text{S3})$$

The phase angle between  $V_L$  and  $V_0$  amounts to  $\phi_L = \tan^{-1}\left(\frac{1}{\omega RC}\right)$ , from which we see that there is a  $\pi/2$  phase shift when increasing  $\omega$  from  $\omega \rightarrow 0$  ( $\phi_L = \pi/2$ ) to  $\omega \rightarrow \infty$  ( $\phi_L = 0$ ). In Fig. S1 we show the power  $P = \frac{|V_L|^2}{R}$  dissipated over the resistor and relatedly, the energy  $W = P \cdot T$  dissipated over the load during one cycle. The power drops to its half-value at the *cut-off* angular frequency  $\omega RC = 1$ . Relatedly, the work is seen to have a maximum  $W(\omega = 1/RC) = \frac{1}{2} CV_0^2$  located at the same frequency.

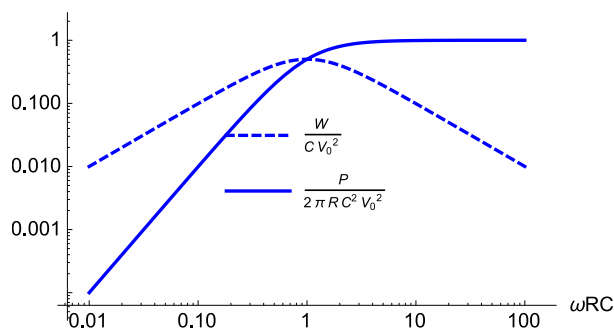

Figure S1. The work and power performed over a load resistor in a traditional RC-circuit.

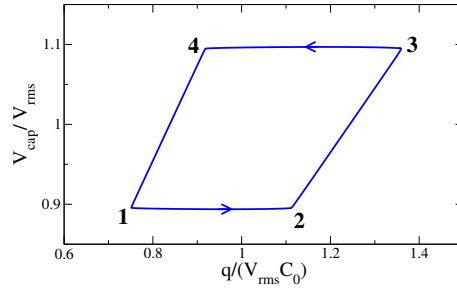

Figure S2. Definition of the state-points

### Variable capacitance RC-circuit

The analytic solution Krupenkin and Taylor [1] present for the case of constant potential  $V(t) = V_0$  with a sinusoidally varying capacitance  $C_{t/b}(t) = C_0(1 + \cos \omega t)$ , can be found by plugging in into eqn (S1). However, for the liquid bridge engine we are interested in, this expression for the capacitance is not correct since a vanishing capacitance would imply a broken bridge.

### Dimensionless equations

The Kirchoff equation eqn (4) is brought in dimensionless form by writing  $q(t) = \hat{q}(\hat{t})V_0C_0$ ,  $t = \hat{t}\omega^{-1}$ ,  $C_{b/t}(t) = C_{b/t}(0)\hat{C}_{b/t}(\hat{t})$  and  $C_{tot} = C_0\hat{C}_{tot}$ , and  $V(t) = V_0\hat{V}(\hat{t})$ . The choice of  $C_0 \equiv C_{tot}(0)$  fixes  $\hat{C}_{tot}^{-1} = \hat{C}_b^{-1} \left(1 + \frac{C_b(0)}{C_t(0)}\right)^{-1} + \hat{C}_t^{-1} \left(1 + \frac{C_t(0)}{C_b(0)}\right)^{-1}$ . Defining  $\alpha = \omega RC_0$ , the Kirchoff equation reads

$$\alpha \frac{d\hat{q}(\hat{t})}{d\hat{t}} + \frac{\hat{q}(\hat{t})}{\hat{C}_{tot}(\hat{t})} = \hat{V}(\hat{t}) \quad (\text{S4})$$

$$\hat{q}(0) = 1 \quad (\text{S5})$$

The energy harvested over the load, written in terms of the dimensionless variables, reads

$$W_L = \int_0^{\hat{t}(T)} d\hat{t} \frac{d\hat{q}(\hat{t})}{d\hat{t}} \left( \hat{V}(\hat{t}) - \frac{\hat{q}(\hat{t})}{\hat{C}_{tot}} \right) V_0^2 C_0 \quad (\text{S6})$$

In a set-up **without external power source** the natural voltage scale is set by  $\frac{Q_b}{C_b(0)}$ , this equation is brought in dimensionless form by writing  $q(t) = \hat{q}(\hat{t})Q_b$ ,  $t = \hat{t}\omega^{-1}$ ,  $C_{tot} = C_0\hat{C}_{tot}$ , and  $C_{b/t}(t) = C_{b/t}(0)\hat{C}_{b/t}(\hat{t})$  which gives

$$\alpha \frac{d\hat{q}(\hat{t})}{d\hat{t}} + \frac{\hat{q}(\hat{t})}{\hat{C}_{tot}(\hat{t})} = \frac{C_0}{C_b(0)} \left( \frac{1}{\hat{C}_b(\hat{t})} - \frac{1}{\hat{C}_t(\hat{t})} \right). \quad (\text{S7})$$

### Static limit of square wave driving

The square wave driving gives a trapezoidal enclosed area such that the harvested work amounts to

$$W_{\omega \rightarrow 0} = ((Q_2 - Q_1) + (Q_3 - Q_4)) \Delta V \quad (\text{S8})$$

The charges can be expressed as  $Q_1 = V_l C_l$ ,  $Q_2 = V_l C_h$ ,  $Q_3 = V_h C_h$ , and  $Q_4 = V_h C_l$  with  $l$  low and  $h$  high. Combining gives

$$W_{\omega \rightarrow 0} = (V_l (C_h - C_l) + V_h (C_h - C_l)) \Delta V \quad (\text{S9})$$

Writing  $\Delta C \equiv C_h - C_l$  and because  $V_l = V_0 - \Delta V$  and  $V_h = V_0 + \Delta V$  we find

$$W_{\omega \rightarrow 0} = 2\Delta C V_0 \Delta V \quad (\text{S10})$$

We normalize this to  $C_0 V_{\text{rms}}^2$ , using that the root mean square potential

$$\frac{W_{\omega \rightarrow 0}}{C_0 V_{\text{rms}}^2} = 2 \frac{\Delta C}{C_0} \frac{\frac{\Delta V}{V_0}}{1 + \left(\frac{\Delta V}{V_0}\right)^2}, \quad (\text{S11})$$

which is maximal at  $\frac{\Delta V}{V_0} = 1$ . For  $L \ll l_c$  we can use that  $A \sim \frac{1}{L}$  together with eqn (3) to find

$$\frac{\Delta C}{C_0} = 2 \frac{\frac{\Delta L}{L_0}}{1 - \left(\frac{\Delta L}{L_0}\right)^2}, \quad (\text{S12})$$

which gives the final result

$$\frac{W_{\omega \rightarrow 0}}{C_0 V_{\text{rms}}^2} = 4 \frac{\frac{\Delta L}{L_0}}{1 - \left(\frac{\Delta L}{L_0}\right)^2} \frac{\frac{\Delta V}{V_0}}{1 + \left(\frac{\Delta V}{V_0}\right)^2}. \quad (\text{S13})$$

---

[1] T. Krupenkin and J. A. Taylor, Nature Communications, 2011, **2**, 448.
